# Supplementary material for: Extraciliary OFD1 Is Involved in Melanocyte Survival through Cell Adhesion to ECM via Paxillin
Source: MDPI journal article supplement (doi:10.3390/ijms242417528), 2023-12-15
Supplement: s1 [file s1]

**Table S1.** Patient demographics.

| No | Sex /Age | Duration    | Type          | Activity | Previous Treatment | Lesional Location and Sampling Sites                                                        |
|----|----------|-------------|---------------|----------|--------------------|---------------------------------------------------------------------------------------------|
| 1  | M/14     | 2 yrs       | Non-segmental | Stable   | Steroid+Excimer    | Face, upper and <u>lower extremities</u> ,<br>dorsa of feet                                 |
| 2  | M/15     | Several yrs | Non-segmental | Active   | None               | <u>Face, upper extremities, back</u>                                                        |
| 3  | M/16     | 6 mos       | Non-segmental | Stable   | Steroid+NB-UVB     | <u>Trunk</u> , inguinal, lower extremities                                                  |
| 4  | M/20     | 2 yrs       | Non-segmental | Active   | Steroid            | Scalp, <u>forehead</u> , nose, perioral,<br>neck, anterior chest, both upper<br>extremities |
| 5  | M/31     | 9 yrs       | Non-segmental | Active   | Steroid+NB-UVB     | Wrists, dorsa of feet, anterior chest,<br><u>abdomen</u>                                    |
| 6  | F/18     | 1 yrs       | Non-segmental | Active   | None               | <u>Arms</u> , trunk                                                                         |
| 7  | F/18     | >5 yrs      | Non-segmental | Active   | Steroid+NB-UVB     | Hands, wrists, anterior chest,<br><u>abdomen</u> , inguinal                                 |
| 8  | F/54     | 2 yrs       | Non-segmental | Active   | None               | <u>Anterior chest, abdomen, both<br/>groins</u>                                             |
| 9  | M/18     | 4 yrs       | Segmental     | Stable   | Steroid+NB-UVB     | <u>Lt forearm</u>                                                                           |
| 10 | F/16     | a few yrs   | Segmental     | Stable   | Steroid+NB-UVB     | <u>Lt breast</u> , anterior chest                                                           |
| 11 | F/51     | a few yrs   | Segmental     | Active   | None               | <u>Rt. Buttock</u> , posterior thigh                                                        |
| 12 | F/52     | 2 yrs       | Segmental     | Stable   | Tacrolimus+NB-UVB  | Rt eyelid, nose, <u>forehead</u>                                                            |
| 13 | F/8      | 4 yrs       | Mixed         | Stable   | Steroid+NB-UVB     | Rt upper lip, chin, <u>neck</u> , scalp                                                     |
| 14 | M/15     | >10 yrs     | Mixed         | Stable   | None               | <u>Rt forehead</u>                                                                          |
| 15 | M/18     | a few yrs   | Localized     | Stable   | Steroid+Excimer    | <u>Rt inner thigh</u>                                                                       |
| 16 | F/9      | 5 yrs       | Localized     | Stable   | Steroid+NB-UVB     | Posterior neck, <u>anterior chest</u>                                                       |

yrs: years, mos; months, steroid: topical steroid, tacrolimus: topical tacrolimus, Lt: left, Rt: right Sampling site of each patient was underlined.
