# Supplementary material for: Extraciliary OFD1 Is Involved in Melanocyte Survival through Cell Adhesion to ECM via Paxillin
Source: MDPI journal article supplement (doi:10.3390/ijms242417528), 2023-12-15
Supplement: s1 [file s1]

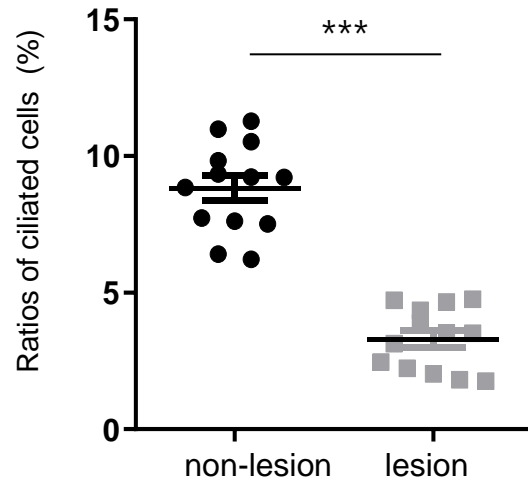

Figure S1. Confocal microscopy using anti-Arl13b and anti- $\gamma$ -tubulin antibodies was performed in biopsied skin samples derived from five vitiligo patients with OFD1 downregulation. The number of ciliated cells was counted in two to three randomly selected high-power fields in each specimen (total 13).
